# Supplementary material for: Ruthenium trihydrides with N-heterocyclic carbene ligands: effects on quantum mechanical exchange coupling
Source: Royal Society of Chemistry journal article supplement (doi:10.1039/b512760b), 2005-01-01

Supporting Information  
for

**‘Ruthenium trihydrides with *N*-heterocyclic carbene ligands:  
effects on quantum mechanical exchange coupling’**

A. L. Jones, G. S. McGrady, P. Sirsch, J. W. Steed

**Contents:**

- S1-S3 - Molecular representation and coordinates of the  
optimised geometry of [Cp\**RuH*<sub>3</sub>(IMes)] **1**
- S4-S5 - Molecular representation and coordinates of the  
optimised geometry of [Cp\**RuH*<sub>3</sub>(PPy<sub>3</sub>)] **3**

**Coordinates for the optimised geometry of [Cp\**RuH*<sub>3</sub>(IMes)] 1**

(atom, x-, y-, z-positions in Å)

|    |           |           |           |
|----|-----------|-----------|-----------|
| Ru | -0.005481 | 0.923878  | -0.590584 |
| N  | -1.083411 | -1.906586 | 0.180232  |
| N  | 1.073507  | -1.908650 | 0.178811  |
| C  | -1.126208 | 2.585138  | 0.664939  |
| C  | 0.075696  | 2.348184  | 1.402845  |
| C  | 1.189573  | 2.624757  | 0.552107  |
| C  | 0.677268  | 3.081867  | -0.719845 |
| C  | -0.754359 | 3.059210  | -0.649640 |
| C  | 0.151502  | 2.015995  | 2.866717  |
| C  | 2.635578  | 2.636614  | 0.964434  |
| C  | 1.501752  | 3.653582  | -1.841113 |
| C  | -1.700819 | 3.608349  | -1.682243 |
| C  | -2.522091 | 2.564000  | 1.224253  |
| C  | -0.004278 | -1.059039 | -0.018057 |
| C  | -0.680999 | -3.205913 | 0.483720  |
| C  | 0.668912  | -3.207199 | 0.482958  |
| C  | -2.483383 | -1.583164 | 0.078082  |
| C  | -3.127814 | -1.710837 | -1.164990 |
| C  | -4.500090 | -1.451247 | -1.220634 |
| C  | -5.233424 | -1.084545 | -0.086728 |
| C  | -4.561956 | -0.999569 | 1.136116  |
| C  | -3.189826 | -1.251053 | 1.244048  |
| C  | 2.473960  | -1.587808 | 0.076341  |
| C  | 3.183376  | -1.266398 | 1.243704  |
| C  | 4.556180  | -1.018282 | 1.135510  |
| C  | 5.225736  | -1.096948 | -0.088756 |
| C  | 4.489793  | -1.454434 | -1.223825 |
| C  | 3.116770  | -1.710506 | -1.168131 |
| C  | -2.368631 | -2.113772 | -2.405169 |
| C  | -6.709439 | -0.775396 | -0.186511 |
| C  | -2.500937 | -1.193053 | 2.586497  |
| C  | 2.499743  | -1.222867 | 2.589555  |
| C  | 6.702559  | -0.791780 | -0.188141 |
| C  | 2.356783  | -2.109137 | -2.409284 |
| H  | -0.027901 | 0.625173  | -2.149022 |
| H  | 1.374896  | 0.409365  | -1.181527 |
| H  | -1.396103 | -3.992974 | 0.664882  |
| H  | -1.402473 | 0.416527  | -1.144883 |
| H  | 1.382645  | -3.995639 | 0.663487  |
| H  | -5.009498 | -1.541647 | -2.177842 |
| H  | -5.118235 | -0.735582 | 2.033254  |
| H  | 5.114712  | -0.763298 | 2.033900  |
| H  | 4.997881  | -1.541420 | -2.182036 |
| H  | -3.046287 | -2.208731 | -3.259071 |
| H  | -1.604208 | -1.367584 | -2.648407 |
| H  | -1.855098 | -3.073670 | -2.271485 |
| H  | -7.218895 | -0.934565 | 0.769798  |
| H  | -6.876587 | 0.271054  | -0.474744 |

## Supporting Information - S2

|   |           |           |           |
|---|-----------|-----------|-----------|
| H | -7.200213 | -1.400182 | -0.940867 |
| H | -1.578721 | -0.606880 | 2.535507  |
| H | -3.156009 | -0.746138 | 3.340680  |
| H | -2.222815 | -2.194345 | 2.940663  |
| H | 3.146065  | -0.755020 | 3.338724  |
| H | 1.560423  | -0.664896 | 2.544011  |
| H | 2.254983  | -2.231208 | 2.948842  |
| H | 7.187872  | -1.403538 | -0.956520 |
| H | 6.872779  | 0.259548  | -0.456096 |
| H | 7.214951  | -0.971821 | 0.762926  |
| H | 1.594468  | -1.360824 | -2.652293 |
| H | 3.034697  | -2.205118 | -3.262874 |
| H | 1.840678  | -3.067825 | -2.276780 |
| H | 0.123529  | 2.932602  | 3.474737  |
| H | -0.687232 | 1.392724  | 3.191998  |
| H | 1.077830  | 1.492765  | 3.120688  |
| H | 2.913868  | 3.605325  | 1.406716  |
| H | 2.854819  | 1.862664  | 1.705640  |
| H | 3.296917  | 2.463051  | 0.111157  |
| H | 1.700281  | 4.724000  | -1.682498 |
| H | 2.468041  | 3.147492  | -1.927251 |
| H | 0.992609  | 3.550530  | -2.803651 |
| H | -1.905954 | 4.674453  | -1.504258 |
| H | -1.289788 | 3.514771  | -2.691559 |
| H | -2.658927 | 3.080383  | -1.669321 |
| H | -2.781187 | 3.531693  | 1.680600  |
| H | -3.263819 | 2.357933  | 0.447637  |
| H | -2.640068 | 1.798374  | 1.996987  |

**Molecular representation of the optimised geometry of [Cp\**Ru*H<sub>3</sub>(IMes)] 1** (all hydrogen atoms except those directly attached to the metal are omitted for clarity)

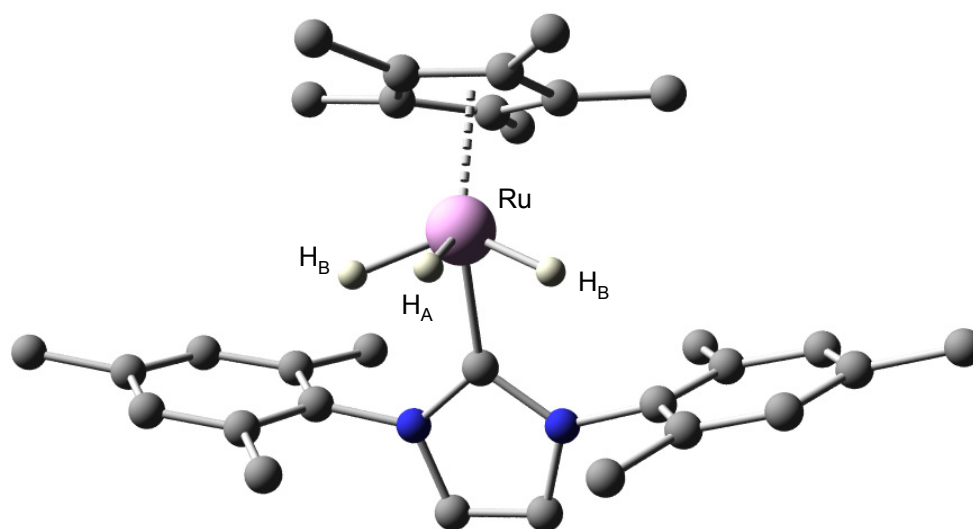

**Coordinates of the optimised geometry of [Cp\**Ru*H<sub>3</sub>(PPy<sub>3</sub>)] 3**

(atom, x-, y-, z-positions in Å)

|    |           |           |           |
|----|-----------|-----------|-----------|
| Ru | 1.119238  | -0.142014 | -0.709919 |
| P  | -1.068775 | -0.020179 | -0.220064 |
| N  | -1.833984 | 1.538719  | -0.120227 |
| N  | -2.193860 | -0.843796 | -1.254099 |
| N  | -1.568648 | -0.694865 | 1.314452  |
| C  | -3.188713 | 1.845705  | -0.259502 |
| C  | -1.162104 | 2.703789  | 0.242840  |
| C  | -2.074055 | 3.722518  | 0.335017  |
| C  | -3.357431 | 3.178584  | 0.013848  |
| C  | -3.398117 | -1.454039 | -0.894760 |
| C  | -4.023551 | -1.873586 | -2.040650 |
| C  | -3.193356 | -1.510729 | -3.146829 |
| C  | -2.083206 | -0.884871 | -2.642607 |
| C  | 3.292084  | 0.517405  | -0.723718 |
| C  | 3.237698  | -0.873791 | -0.369892 |
| C  | 2.579587  | -0.979433 | 0.911409  |
| C  | 2.244664  | 0.343294  | 1.347594  |
| C  | 2.674671  | 1.270150  | 0.342217  |
| C  | 3.904522  | -1.998611 | -1.111986 |
| C  | 2.453097  | -2.229227 | 1.736871  |
| C  | 1.622694  | 0.686781  | 2.672677  |
| C  | 2.686868  | 2.769619  | 0.458329  |
| C  | 4.024109  | 1.105153  | -1.898434 |
| C  | -1.209035 | -1.972365 | 1.734656  |
| C  | -1.768307 | -2.198006 | 2.968022  |
| C  | -2.495195 | -1.021866 | 3.329402  |
| C  | -2.362725 | -0.118256 | 2.304444  |
| H  | 1.006607  | -0.520670 | -2.248099 |
| H  | 0.621054  | -1.626281 | -1.038789 |
| H  | 0.667002  | 1.034106  | -1.698118 |
| H  | 1.563938  | -2.206078 | 2.372827  |
| H  | 3.326692  | -2.347057 | 2.393990  |
| H  | 2.393003  | -3.123127 | 1.109237  |
| H  | 3.936044  | -1.805549 | -2.187779 |
| H  | 4.939407  | -2.131896 | -0.766496 |
| H  | 3.379978  | -2.946410 | -0.962974 |
| H  | 1.121470  | 1.658195  | 2.646432  |
| H  | 2.387877  | 0.733832  | 3.460219  |
| H  | 0.881557  | -0.058881 | 2.976310  |
| H  | 2.499136  | 3.255768  | -0.503306 |
| H  | 3.664993  | 3.118593  | 0.818770  |
| H  | 1.938916  | 3.131777  | 1.169723  |
| H  | 3.565734  | 2.041199  | -2.229782 |
| H  | 5.070069  | 1.320388  | -1.637281 |
| H  | 4.029846  | 0.420986  | -2.751298 |
| H  | -0.605002 | -2.603078 | 1.100024  |
| H  | -1.673054 | -3.106922 | 3.547257  |
| H  | -3.049267 | -0.856674 | 4.243959  |

|   |           |           |           |
|---|-----------|-----------|-----------|
| H | -2.750540 | 0.881488  | 2.187168  |
| H | -3.677616 | -1.551018 | 0.142944  |
| H | -4.967144 | -2.401532 | -2.083320 |
| H | -3.387040 | -1.702307 | -4.193811 |
| H | -1.214355 | -0.470379 | -3.129757 |
| H | -0.092479 | 2.688391  | 0.373197  |
| H | -1.849168 | 4.750784  | 0.585318  |
| H | -4.296068 | 3.715069  | -0.032253 |
| H | -3.896188 | 1.088883  | -0.561500 |

**Molecular representation of the optimised geometry of [Cp\**Ru*H<sub>3</sub>(PPy<sub>3</sub>)] **3** (all hydrogen atoms except those directly attached to the metal are omitted for clarity)**

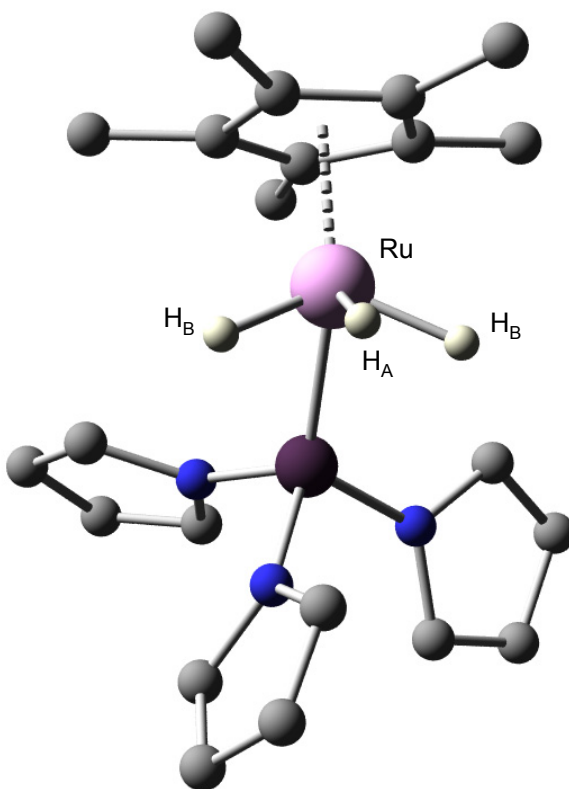

Supplement: b512760b.pdf [file b512760b.pdf]
